# Supplementary material for: Quality of life after pulmonary embolism: validation of the French version of the PEmb-QoL questionnaire
Source: PubMed Central journal article supplement (PMC4260180; doi:10.1186/s12955-014-0174-4), 2014-12-03
Supplement: 12955_2014_174_MOESM1_ESM.pdf [file 12955_2014_174_MOESM1_ESM.pdf]

# ***PEmb-QoL*** **QUESTIONNAIRE**

Questionnaire

après avoir eu une

**EMBOLIE PULMONAIRE**

**INSTRUCTIONS POUR REPONDRE:**

Veillez répondre à toutes les questions. Si vous ne savez pas comment répondre, choisissez la réponse la plus proche de votre situation.

Ce questionnaire concerne **vos poumons**. Les informations que vous allez donner doivent décrire ce que vous ressentez. Vous pouvez aussi indiquer si vous vous sentez capable de réaliser des activités quotidiennes normales.

|           |                                                                                                                      |                                       |                                       |                                       |                                       |                                       |
|-----------|----------------------------------------------------------------------------------------------------------------------|---------------------------------------|---------------------------------------|---------------------------------------|---------------------------------------|---------------------------------------|
| <b>1.</b> | Au cours de ces <u>4 dernières semaines</u> , combien de fois avez-vous ressenti les plaintes pulmonaires suivantes? |                                       |                                       |                                       |                                       |                                       |
|           | <i>(cocher la réponse de votre choix, une par ligne)</i>                                                             | <b>Tous les jours</b>                 | <b>Plusieurs fois par semaine</b>     | <b>Environ une fois par semaine</b>   | <b>Moins d'une fois par semaine</b>   | <b>Jamais</b>                         |
| 1.a       | Douleur(s) derrière ou entre les omoplates ?                                                                         | <input type="checkbox"/> <sub>1</sub> | <input type="checkbox"/> <sub>2</sub> | <input type="checkbox"/> <sub>3</sub> | <input type="checkbox"/> <sub>4</sub> | <input type="checkbox"/> <sub>5</sub> |
| 1.b       | Douleur(s) dans ou sur la poitrine ?                                                                                 | <input type="checkbox"/> <sub>1</sub> | <input type="checkbox"/> <sub>2</sub> | <input type="checkbox"/> <sub>3</sub> | <input type="checkbox"/> <sub>4</sub> | <input type="checkbox"/> <sub>5</sub> |
| 1.c       | Douleur(s) dans le dos ?                                                                                             | <input type="checkbox"/> <sub>1</sub> | <input type="checkbox"/> <sub>2</sub> | <input type="checkbox"/> <sub>3</sub> | <input type="checkbox"/> <sub>4</sub> | <input type="checkbox"/> <sub>5</sub> |
| 1.d       | Sensation d'oppression thoracique?                                                                                   | <input type="checkbox"/> <sub>1</sub> | <input type="checkbox"/> <sub>2</sub> | <input type="checkbox"/> <sub>3</sub> | <input type="checkbox"/> <sub>4</sub> | <input type="checkbox"/> <sub>5</sub> |
| 1.e       | Sensation qu'il y a toujours « quelque chose là » ?                                                                  | <input type="checkbox"/> <sub>1</sub> | <input type="checkbox"/> <sub>2</sub> | <input type="checkbox"/> <sub>3</sub> | <input type="checkbox"/> <sub>4</sub> | <input type="checkbox"/> <sub>5</sub> |
| 1.f       | Sensation de brûlures aux poumons ?                                                                                  | <input type="checkbox"/> <sub>1</sub> | <input type="checkbox"/> <sub>2</sub> | <input type="checkbox"/> <sub>3</sub> | <input type="checkbox"/> <sub>4</sub> | <input type="checkbox"/> <sub>5</sub> |
| 1.g       | Sensation lancinante aux poumons ?                                                                                   | <input type="checkbox"/> <sub>1</sub> | <input type="checkbox"/> <sub>2</sub> | <input type="checkbox"/> <sub>3</sub> | <input type="checkbox"/> <sub>4</sub> | <input type="checkbox"/> <sub>5</sub> |
| 1.h       | Difficulté à respirer ou essoufflement ?                                                                             | <input type="checkbox"/> <sub>1</sub> | <input type="checkbox"/> <sub>2</sub> | <input type="checkbox"/> <sub>3</sub> | <input type="checkbox"/> <sub>4</sub> | <input type="checkbox"/> <sub>5</sub> |

|                                       |                                                                                                                                                |                                       |                             |  |
|---------------------------------------|------------------------------------------------------------------------------------------------------------------------------------------------|---------------------------------------|-----------------------------|--|
| <b>2.</b>                             | A quel moment de la journée vos <b>plaintes pulmonaires</b> sont-elles <b>les plus intenses</b> ?<br><i>(cocher la réponse de votre choix)</i> |                                       |                             |  |
| <input type="checkbox"/> <sub>1</sub> | Au réveil                                                                                                                                      | <input type="checkbox"/> <sub>4</sub> | Pendant la nuit             |  |
| <input type="checkbox"/> <sub>2</sub> | A la mi-journée                                                                                                                                | <input type="checkbox"/> <sub>5</sub> | A tout moment de la journée |  |
| <input type="checkbox"/> <sub>3</sub> | En fin de journée                                                                                                                              | <input type="checkbox"/> <sub>6</sub> | Jamais                      |  |

|                                       |                                                                                                                                                            |                                       |                                                |  |
|---------------------------------------|------------------------------------------------------------------------------------------------------------------------------------------------------------|---------------------------------------|------------------------------------------------|--|
| <b>3.</b>                             | Par rapport à l'année dernière à la même époque, comment évaluez-vous l'état de <b>vos poumons</b> en ce moment? <i>(cocher la réponse de votre choix)</i> |                                       |                                                |  |
| <input type="checkbox"/> <sub>1</sub> | Bien meilleurs maintenant que l'an dernier                                                                                                                 | <input type="checkbox"/> <sub>4</sub> | Plutôt moins bon maintenant que l'an dernier   |  |
| <input type="checkbox"/> <sub>2</sub> | Plutôt meilleurs maintenant que l'an dernier                                                                                                               | <input type="checkbox"/> <sub>5</sub> | Beaucoup moins bon maintenant que l'an dernier |  |
| <input type="checkbox"/> <sub>3</sub> | A peu près pareils maintenant que l'an dernier                                                                                                             | <input type="checkbox"/> <sub>6</sub> | Je n'avais aucun problème pulmonaire           |  |

|           |                                                                                                                                                                                                                                      |                                       |                                       |                                       |                                       |
|-----------|--------------------------------------------------------------------------------------------------------------------------------------------------------------------------------------------------------------------------------------|---------------------------------------|---------------------------------------|---------------------------------------|---------------------------------------|
| <b>4.</b> | Voici une liste d'activités que vous pouvez avoir à faire dans votre vie de tous les jours.<br>Est-ce que <b>vos plaintes pulmonaires</b> <u>limitent</u> les activités suivantes ?<br>Si tel est le cas, combien êtes-vous limité ? |                                       |                                       |                                       |                                       |
|           | <i>(cocher la réponse de votre choix, une par ligne)</i>                                                                                                                                                                             | <b>Je ne travaille pas</b>            | <b>OUI, très limité</b>               | <b>OUI, un peu limité</b>             | <b>NON, pas du tout limité</b>        |
| 4.a       | Activités quotidiennes au travail                                                                                                                                                                                                    | <input type="checkbox"/> <sub>0</sub> | <input type="checkbox"/> <sub>1</sub> | <input type="checkbox"/> <sub>2</sub> | <input type="checkbox"/> <sub>3</sub> |
| 4.b       | <b>Activités quotidiennes domestiques</b><br>(par exemple: faire le ménage, repasser, bricoler, jardiner, etc...)                                                                                                                    |                                       | <input type="checkbox"/> <sub>1</sub> | <input type="checkbox"/> <sub>2</sub> | <input type="checkbox"/> <sub>3</sub> |
| 4.c       | <b>Activités sociales ou de loisirs</b> (par exemple: voyager, aller au cinéma, aller à une soirée, faire des courses, etc...)                                                                                                       |                                       | <input type="checkbox"/> <sub>1</sub> | <input type="checkbox"/> <sub>2</sub> | <input type="checkbox"/> <sub>3</sub> |
| 4.d       | <b>Effort physique important</b> (par exemple : courir, soulever des charges lourdes, faire une activité sportive intense)                                                                                                           |                                       | <input type="checkbox"/> <sub>1</sub> | <input type="checkbox"/> <sub>2</sub> | <input type="checkbox"/> <sub>3</sub> |
| 4.e       | <b>Effort physique modéré</b> (par ex. déplacer une table, passer l'aspirateur, nager ou faire du vélo)                                                                                                                              |                                       | <input type="checkbox"/> <sub>1</sub> | <input type="checkbox"/> <sub>2</sub> | <input type="checkbox"/> <sub>3</sub> |

|     |                                                         |                                       |                                       |                                       |
|-----|---------------------------------------------------------|---------------------------------------|---------------------------------------|---------------------------------------|
| 4.f | Monter ou porter les courses                            | <input type="checkbox"/> <sub>1</sub> | <input type="checkbox"/> <sub>2</sub> | <input type="checkbox"/> <sub>3</sub> |
| 4.g | Monter <b>plusieurs</b> étages d'escaliers              | <input type="checkbox"/> <sub>1</sub> | <input type="checkbox"/> <sub>2</sub> | <input type="checkbox"/> <sub>3</sub> |
| 4.h | Monter <b>un</b> étage d'escaliers                      | <input type="checkbox"/> <sub>1</sub> | <input type="checkbox"/> <sub>2</sub> | <input type="checkbox"/> <sub>3</sub> |
| 4.i | Vous pencher en avant, vous agenouiller, vous accroupir | <input type="checkbox"/> <sub>1</sub> | <input type="checkbox"/> <sub>2</sub> | <input type="checkbox"/> <sub>3</sub> |
| 4.j | Marcher <b>plus de 800 mètres</b>                       | <input type="checkbox"/> <sub>1</sub> | <input type="checkbox"/> <sub>2</sub> | <input type="checkbox"/> <sub>3</sub> |
| 4.k | Marcher <b>quelques centaines de mètres</b>             | <input type="checkbox"/> <sub>1</sub> | <input type="checkbox"/> <sub>2</sub> | <input type="checkbox"/> <sub>3</sub> |
| 4.l | Marcher <b>environ 100 mètres</b>                       | <input type="checkbox"/> <sub>1</sub> | <input type="checkbox"/> <sub>2</sub> | <input type="checkbox"/> <sub>3</sub> |
| 4.m | Vous laver et vous habiller seul(e)                     | <input type="checkbox"/> <sub>1</sub> | <input type="checkbox"/> <sub>2</sub> | <input type="checkbox"/> <sub>3</sub> |

|           |                                                                                                                                                                                             |                                       |                                       |
|-----------|---------------------------------------------------------------------------------------------------------------------------------------------------------------------------------------------|---------------------------------------|---------------------------------------|
| <b>5.</b> | Au cours de ces <u>4 dernières semaines</u> , avez-vous eu les problèmes suivants dans votre travail ou dans vos activités de tous les jours <u>en raison de vos plaintes pulmonaires</u> ? |                                       |                                       |
|           | <i>(cocher la réponse de votre choix, une par ligne)</i>                                                                                                                                    | <b>OUI</b>                            | <b>NON</b>                            |
| 5.a       | Avez-vous réduit <b>le temps</b> passé à votre travail ou à vos activités habituelles?                                                                                                      | <input type="checkbox"/> <sub>1</sub> | <input type="checkbox"/> <sub>2</sub> |
| 5.b       | Avez-vous <b>fait moins de choses</b> que ce que vous auriez souhaité?                                                                                                                      | <input type="checkbox"/> <sub>1</sub> | <input type="checkbox"/> <sub>2</sub> |
| 5.c       | Avez-vous été limité pour faire <b>certaines</b> choses à votre travail ou lors de vos activités habituelles?                                                                               | <input type="checkbox"/> <sub>1</sub> | <input type="checkbox"/> <sub>2</sub> |
| 5.d       | Avez-vous eu des <b>difficultés</b> à faire votre travail ou tout autre activité (par exemple cela vous a-t-il demandé un effort supplémentaire)?                                           | <input type="checkbox"/> <sub>1</sub> | <input type="checkbox"/> <sub>2</sub> |

|                                       |                                                                                                                                                                                                                                |                                       |             |
|---------------------------------------|--------------------------------------------------------------------------------------------------------------------------------------------------------------------------------------------------------------------------------|---------------------------------------|-------------|
| <b>6.</b>                             | Au cours de ces <u>4 dernières semaines</u> , dans quelle mesure vos <b>plaintes pulmonaires</b> vous ont-elles gêné dans vos activités sociales habituelles avec votre famille, vos amis, vos voisins ou d'autres personnes ? |                                       |             |
|                                       | <i>(cocher la réponse de votre choix)</i>                                                                                                                                                                                      | <input type="checkbox"/> <sub>3</sub> | Moyennement |
| <input type="checkbox"/> <sub>1</sub> | Pas du tout                                                                                                                                                                                                                    | <input type="checkbox"/> <sub>4</sub> | Beaucoup    |
| <input type="checkbox"/> <sub>2</sub> | Un petit peu                                                                                                                                                                                                                   | <input type="checkbox"/> <sub>5</sub> | Enormément  |

|                                       |                                                                                                                                                 |                                       |             |
|---------------------------------------|-------------------------------------------------------------------------------------------------------------------------------------------------|---------------------------------------|-------------|
| <b>7.</b>                             | Quelle a été l'importance de vos <u>douleurs dans la région des omoplates/ dans la poitrine</u> , au cours de ces <u>4 dernières semaines</u> ? |                                       |             |
|                                       | <i>(cocher la réponse de votre choix)</i>                                                                                                       |                                       |             |
| <input type="checkbox"/> <sub>1</sub> | Nulle                                                                                                                                           | <input type="checkbox"/> <sub>4</sub> | Moyenne     |
| <input type="checkbox"/> <sub>2</sub> | Très faible                                                                                                                                     | <input type="checkbox"/> <sub>5</sub> | Grande      |
| <input type="checkbox"/> <sub>3</sub> | Faible                                                                                                                                          | <input type="checkbox"/> <sub>6</sub> | Très grande |

|                                       |                                                                                                         |                                       |             |
|---------------------------------------|---------------------------------------------------------------------------------------------------------|---------------------------------------|-------------|
| <b>8.</b>                             | Au cours de ces <u>4 dernières semaines</u> , quelle a été l'importance de votre <u>essoufflement</u> ? |                                       |             |
|                                       | <i>(cocher la réponse de votre choix)</i>                                                               |                                       |             |
| <input type="checkbox"/> <sub>1</sub> | Nulle                                                                                                   | <input type="checkbox"/> <sub>4</sub> | Moyenne     |
| <input type="checkbox"/> <sub>2</sub> | Très faible                                                                                             | <input type="checkbox"/> <sub>5</sub> | Grande      |
| <input type="checkbox"/> <sub>3</sub> | Faible                                                                                                  | <input type="checkbox"/> <sub>6</sub> | Très grande |

|    |                                                                                                                                                                                                                                                                                                                                     |                                       |                                       |                                       |                                       |                                       |                                       |
|----|-------------------------------------------------------------------------------------------------------------------------------------------------------------------------------------------------------------------------------------------------------------------------------------------------------------------------------------|---------------------------------------|---------------------------------------|---------------------------------------|---------------------------------------|---------------------------------------|---------------------------------------|
| 9. | Les questions qui suivent portent sur comment vous vous êtes senti(e) <u>au cours de ces 4 dernières semaines en raison de vos <b>plaintes pulmonaires</b></u> . Pour chaque question, merci d'indiquer la réponse qui vous semble la plus appropriée.<br>Au cours de ces <u>4 dernières semaines</u> , y a-t-il eu des moments où: |                                       |                                       |                                       |                                       |                                       |                                       |
|    | <i>(cocher la réponse de votre choix, une par ligne)</i>                                                                                                                                                                                                                                                                            | <b>En permanence</b>                  | <b>Très souvent</b>                   | <b>Souvent</b>                        | <b>Quel-quefois</b>                   | <b>Rarement</b>                       | <b>Jamais</b>                         |
| a. | Vous avez été préoccupé(e) par l'idée d'avoir une nouvelle embolie pulmonaire ?                                                                                                                                                                                                                                                     | <input type="checkbox"/> <sub>1</sub> | <input type="checkbox"/> <sub>2</sub> | <input type="checkbox"/> <sub>3</sub> | <input type="checkbox"/> <sub>4</sub> | <input type="checkbox"/> <sub>5</sub> | <input type="checkbox"/> <sub>6</sub> |
| b. | Vous vous êtes senti(e) irritable?                                                                                                                                                                                                                                                                                                  | <input type="checkbox"/> <sub>1</sub> | <input type="checkbox"/> <sub>2</sub> | <input type="checkbox"/> <sub>3</sub> | <input type="checkbox"/> <sub>4</sub> | <input type="checkbox"/> <sub>5</sub> | <input type="checkbox"/> <sub>6</sub> |
| c. | Vous seriez inquiet(e) à l'idée de devoir arrêter vos médicaments anticoagulants?                                                                                                                                                                                                                                                   | <input type="checkbox"/> <sub>1</sub> | <input type="checkbox"/> <sub>2</sub> | <input type="checkbox"/> <sub>3</sub> | <input type="checkbox"/> <sub>4</sub> | <input type="checkbox"/> <sub>5</sub> | <input type="checkbox"/> <sub>6</sub> |
| d. | Vous êtes devenu(e) plus facilement émotif/émotive ?                                                                                                                                                                                                                                                                                | <input type="checkbox"/> <sub>1</sub> | <input type="checkbox"/> <sub>2</sub> | <input type="checkbox"/> <sub>3</sub> | <input type="checkbox"/> <sub>4</sub> | <input type="checkbox"/> <sub>5</sub> | <input type="checkbox"/> <sub>6</sub> |
| e. | Est-ce que cela vous a dérangé d'être plus rapidement émotif/émotive ?                                                                                                                                                                                                                                                              | <input type="checkbox"/> <sub>1</sub> | <input type="checkbox"/> <sub>2</sub> | <input type="checkbox"/> <sub>3</sub> | <input type="checkbox"/> <sub>4</sub> | <input type="checkbox"/> <sub>5</sub> | <input type="checkbox"/> <sub>6</sub> |
| f. | Vous avez été déprimé(e) ou avec un moral bas ?                                                                                                                                                                                                                                                                                     | <input type="checkbox"/> <sub>1</sub> | <input type="checkbox"/> <sub>2</sub> | <input type="checkbox"/> <sub>3</sub> | <input type="checkbox"/> <sub>4</sub> | <input type="checkbox"/> <sub>5</sub> | <input type="checkbox"/> <sub>6</sub> |
| g. | Vous vous êtes senti(e) comme un fardeau pour votre famille ou vos amis?                                                                                                                                                                                                                                                            | <input type="checkbox"/> <sub>1</sub> | <input type="checkbox"/> <sub>2</sub> | <input type="checkbox"/> <sub>3</sub> | <input type="checkbox"/> <sub>4</sub> | <input type="checkbox"/> <sub>5</sub> | <input type="checkbox"/> <sub>6</sub> |
| h. | Vous avez eu peur peur de faire des efforts physiques ?                                                                                                                                                                                                                                                                             | <input type="checkbox"/> <sub>1</sub> | <input type="checkbox"/> <sub>2</sub> | <input type="checkbox"/> <sub>3</sub> | <input type="checkbox"/> <sub>4</sub> | <input type="checkbox"/> <sub>5</sub> | <input type="checkbox"/> <sub>6</sub> |
| i. | Vous vous êtes senti(e) limité(e) pour faire une excursion ?                                                                                                                                                                                                                                                                        | <input type="checkbox"/> <sub>1</sub> | <input type="checkbox"/> <sub>2</sub> | <input type="checkbox"/> <sub>3</sub> | <input type="checkbox"/> <sub>4</sub> | <input type="checkbox"/> <sub>5</sub> | <input type="checkbox"/> <sub>6</sub> |
| j. | Vous avez eu peur d'être seul(e) ?                                                                                                                                                                                                                                                                                                  | <input type="checkbox"/> <sub>1</sub> | <input type="checkbox"/> <sub>2</sub> | <input type="checkbox"/> <sub>3</sub> | <input type="checkbox"/> <sub>4</sub> | <input type="checkbox"/> <sub>5</sub> | <input type="checkbox"/> <sub>6</sub> |

**Nous vous remercions pour votre collaboration.**
